# Supplementary material
Source: publisher figshare collection journal article supplement (https://karger.figshare.com/ndownloader/files/35904656)
Supplement: Supplementary file 1 [file 35904656]

**Table S3. Known functions of 15 hub genes.**

| Gene | Known function |
| --- | --- |
| DCN | a member of the small leucine-rich proteoglycan family of proteins; Collagen fibril assembly; Tumor suppression. |
| SERPINF1 | a member of the serpin family;  Inhibiting angiogenesis;  Neurotrophic factor in neuronal differentiation in retinoblastoma cells. |
| ITGBL1 | Encoding a β integrin-related protein from EGF-like protein family;  The encoded protein contains integrin-like cysteine-rich repeats. |
| MEDAG | Positive regulation of fat cell differentiation. |
| GPX8 | Peroxidase activity; Cellular response to oxidative stress; Located in endoplasmic reticulum lumen. |
| TROAP | Cell adhesion; Located in cytoplasm. |
| MT3 | A member of the metallothionein family, induced under hypoxic conditions ； Important in zinc and copper homeostasis； The encoded protein is a growth inhibitory factor； Reduced levels of the protein are observed in the brains of individuals with some metal-linked neurodegenerative disorders. |
| CTSS | The preproprotein(a member of the peptidase C1 family)： the degradation of antigenic proteins to peptides for presentation on MHC class II molecules; The mature protein： the formation of antigen-MHC class II complexes; the proper display of extracellular antigenic peptides by MHC-II;  remodel components of the extracellular matrix such as elastin, collagen, and fibronectin; Implicated in the pathology of many inflammatory and autoimmune diseases. |
| TLR8 | A member of the Toll-like receptor (TLR) family (plays a fundamental role in pathogen recognition and activation of innate immunity). |
| SOX15 | A member of the SOX (SRY-related HMG-box) family of transcription factors; The regulation of embryonic develop ment;  The determination of the cell fate. |
| YIF1B | Endoplasmic reticulum to Golgi vesicle-mediated transport; Protein targeting to membrane; and sperm axoneme assembly; Located in Golgi apparatus; Endoplasmic reticulum; |
| LAPTM5 | Encoding a transmembrane receptor that is associated with lysosomes; The encoded protein may play a role in hematopoiesis |
| SOX1 | Encoding a member of the SOX (SRY-related HMG-box) family of transcription factors; The regulation of embryonic development and in the determination of the cell fate; Transcriptional activator after forming a protein complex with other proteins. |
| FERMT3 | Protein-protein interactions involved in integrin activation; Cell adhesion, migration, differentiation, and proliferation. |
| NCF4 | A cytosolic regulatory component of the superoxide-producing phagocyte NADPH-oxidase; |
